# Supplementary material for: Highly sensitive ELISA‐based assay for quantification of allergen‐specific IgE antibody levels
Source: PubMed Central journal article supplement (PMC7687237; doi:10.1111/all.14325), 2020-05-27
Supplement: ALL-75-2668-s001.pdf [file ALL-75-2668-s001.pdf]

1 **Highly sensitive ELISA-based assay for quantification of allergen-specific IgE**  
2 **antibody levels**

3 Antonina Karsonova<sup>1</sup>, Ksenja Riabova<sup>1</sup>, Sergio Villazala-Merino<sup>2</sup>, Raffaella Campana<sup>3</sup>, Verena  
4 Niederberger<sup>2</sup>, Julia Eckl-Dorna<sup>2</sup>, Renate Fröschl<sup>4</sup>, Thomas Perkmann<sup>4</sup>, Yury V. Zhernov<sup>5</sup>, Olga  
5 G. Elisyutina<sup>5</sup>, Elena S. Fedenko<sup>5</sup>, Musa R. Khaitov<sup>5</sup>, Daria Fomina<sup>1,6</sup>, Evgeniy Beltiukov<sup>7</sup>,  
6 Marianne van Hage<sup>8</sup>, Hans Grönlund<sup>9</sup>, Rudolf Valenta<sup>3,10</sup>, Alexander Karaulov<sup>1</sup>, Mirela Curin<sup>3</sup>

7 <sup>1</sup>Laboratory of Immunopathology, Department of Clinical Immunology and Allergy, Sechenov  
8 First Moscow State Medical University, Moscow, Russian Federation. <sup>2</sup>Department of  
9 Otorhinolaryngology, Medical University of Vienna, Vienna, Austria. <sup>3</sup>Division of  
10 Immunopathology, Department of Pathophysiology and Allergy Research, Center for  
11 Pathophysiology, Infectiology and Immunology, Medical University of Vienna, Vienna, Austria  
12 <sup>4</sup>Department of Laboratory Medicine, Medical University of Vienna, Vienna, Austria. <sup>5</sup>National  
13 Research Center - Institute of Immunology FMBA of Russia, Moscow, Russian Federation. <sup>6</sup>City  
14 Hospital #52, Moscow, Russian Federation. <sup>7</sup>Ural State Medical University, Ekaterinburg,  
15 Russian Federation. <sup>8</sup>Division of Immunology and Allergy, Department of Medicine Solna,  
16 Karolinska Institutet and Karolinska University Hospital, SE-171 77, Stockholm, Sweden.  
17 <sup>9</sup>Department of Clinical Neuroscience, Therapeutic Immune Design Unit, Karolinska Institutet,  
18 Stockholm, Sweden. <sup>10</sup>Karl Landsteiner University for Healthcare Sciences, Krems, Austria.

19 **Correspondence:**

20 Mirela Curin, Department of Pathophysiology and Allergy Research, Center for Pathophysiology,  
21 Infectiology and Immunology, Medical University of Vienna, Währinger Gürtel 18-20, A-1090  
22 Vienna, Austria. Email: [mirela.curin@meduniwien.ac.at](mailto:mirela.curin@meduniwien.ac.at)

## 23 **Methods**

24 *Expression, purification and characterisation of human allergen-specific monoclonal IgE*  
25 *(IgE<sub>moAb</sub>), recombinant allergens*

26 In the humanised monoclonal Bet v 1-specific IgE antibody, the variable region of a mouse IgG<sub>1</sub>  
27 antibody specific for the major birch pollen allergy (Bet v 1)<sup>S1</sup>, was fused to the human epsilon  
28 heavy chain and the DNA construct was introduced into hybridoma cells by electroporation<sup>S1, S2</sup>.  
29 Hybridoma cells were cultured in CD Hybridomamedium (ThermoScientific, Uppsala, Sweden)  
30 supplemented with Glutamax<sup>TM</sup> (Thermo Scientific) into which IgE<sub>moAb</sub> was secreted. A  
31 monoclonal anti-human IgE antibody, mAb12<sup>S2, S3</sup>, was used to purify IgE<sub>moAb</sub> from cell  
32 culture supernatants by single step affinity chromatography. Purified IgE<sub>moAb</sub> was dissolved in  
33 PBS and kept frozen at -20°C until use. The concentration of purified IgE<sub>moAb</sub> was determined  
34 by BCA assay (Pierce, Rockford, IL, USA). In order to check the purity of IgE<sub>moAb</sub>, 1 and 2 µg  
35 purified antibody along with a protein weight ladder (PageRuler prestained Protein Ladder Plus,  
36 Fermentas, St. Leon-Rot, Germany) were loaded onto a 15% polyacrylamide gel and separated  
37 by SDS-PAGE under non-reducing and reducing conditions, followed by Coomassie Blue  
38 staining. Likewise, 10 and 20 ng IgE<sub>moAb</sub> were loaded onto a 15% polyacrylamide gel and  
39 separated by SDS-PAGE, followed by semi-dried transfer to a nitrocellulose membrane (GE  
40 Healthcare, Chicago, IL, USA). Human IgE was detected upon incubation with 1:5000 Anti-  
41 human IgE-HRP (Seracare, Milford, MA, USA).

42 The far UV circular dichroism (CD) spectrum of purified IgE<sub>moAb</sub> was determined using a Jasco  
43 J-810 spectropolarimeter (Japan Spectroscopic Co., Tokyo, Japan). An aliquot of 400 µL of a  
44 solution with a concentration of 200 µg/mL IgE<sub>moAb</sub> in 10 mM NaH<sub>2</sub>PO<sub>4</sub> (pH=7) was placed in  
45 a 1mm path length quartz cuvette and its spectrum was measured from 260 to 190 nm with a

46 resolution of 0.5 nm at 50 nm/min. The measurement was repeated three times and averaged.  
47 Purified recombinant Bet v 1 was obtained from BIOMAY (Vienna, Austria) and rFel d 1 was  
48 expressed and purified as described<sup>S4</sup>.

49

50 *Demographic and clinical characterization of allergic patients and non-allergic control subjects*

51 Experiments were conducted with serum samples of clinically well characterized cat (n = 19) and  
52 birch (n = 19) allergic patients from the Russian Federation after having obtained informed  
53 consent of the patients or patient`s parents in the case of children. Blood was collected at certified  
54 medical centers by licensed medical personnel (Institute of Immunology FMBA of Russia,  
55 Moscow; City Hospital #52, Moscow, and Ural State Medical University, Ekaterinburg, Russian  
56 Federation). The study was approved by the Ethic Committee of NRC Institute of Immunology  
57 FMBA of Russia- protocol No. 3, dated 09.03.2017, performed according to declaration of  
58 Helsinki and all participants gave their written informed consent. Each patient completed a  
59 questionnaire that contained demographic data, such as age and gender and questions about the  
60 symptoms that patients experienced in contact with birch and/or cat. Inclusion criteria were  
61 reported clinical symptoms of either asthma, rhinitis, conjunctivitis and/or dermatitis upon  
62 exposure to cat or birch. Full description of clinical and demographic characteristics of patients  
63 with birch and cat allergy, including phenotypes (asthma, rhinitis, conjunctivitis or dermatitis) are  
64 shown in Table S1. Representative sera were selected to comprise the range from low to high of  
65 allergen-specific IgE levels. Serum from a non-allergic individual was included as control.

66

67 *Establishment of IgE<sub>moAb</sub>-based standard curves for quantification of sIgE by ELISA*

68 Standard curves for the quantification of allergen-specific IgE were established using ELISA  
69 plate coated with rBet v 1 and defined dilutions containing different concentrations of IgEAb  
70 (i.e., 2.42 µg/ml , 242 ng/ml, 121 ng/ml, 60.5 ng/ml, 24.2 ng/ml, 12.1 ng/ml, 6.05 ng/ml, 3.02  
71 ng/ml, 2.42 ng/ml). The dilutions of IgEAb were prepared in 2% BSA in 0.5% PBS-Tween  
72 buffer to prevent loss of IgEAb due to binding to the plastic vials used for preparing the  
73 dilutions (Safe-Lock Tubes 1.5 ml Cat. № 0030120086, Eppendorf, Hamburg, Germany). In pilot  
74 experiments, different concentrations of rBet v 1 (1µg/ml, 2 µg/ml, 5µg/ml) were used for  
75 coating of ELISA plates (96 well F-bottom microplate, Greiner Bio-One GmbH, Germany) and a  
76 concentration of 1 µg/ml of Bet v 1 was found to be suitable for obtaining a standard curve. After  
77 coating with rBet v 1 in Bicarbonate buffer plates were blocked with 1% BSA in 0.5% PBS-  
78 Tween (200 µl/well) for 2.5 h at 37 °C. Different dilutions of IgEAb in TBS containing 0.5%  
79 v/v Tween 20 (TBS-T) and 2% BSA were added to the ELISA plates and bound IgE was detected  
80 with HRP-coupled goat anti-human IgE antibodies diluted 1 : 2500 (KPL, Gaithersburg, MD).  
81 The OD values corresponding to bound antibodies were measured at 405 and 490 nm on ELISA  
82 reader CLARIOstar (BMG Labtech, Germany). All determinations were conducted in triplicates,  
83 and results were expressed as mean values with a variation coefficient of less than 5%. Based on  
84 the ELISA results the standard curve was established allowing to measure and quantify allergen-  
85 specific IgE. The equation describing the Standard Curve was determined as  $y = -60.302 - 50.933x -$   
86  $30.103x^3 + 60,7969e^x$  using TableCurve 2D Software.

87

#### 88 *Quantification of sIgE in sera from allergic patients by ELISA*

89 For coating the ELISA plates, 1µg/ml of rBet v 1 or 1µg/ml of rFel d 1 were incubated in  
90 Bicarbonate buffer, (100µl/well) overnight at 4°C. After the plates were washed 3 times with

91 200µl/well of PBS-Tween unspecific bindings were blocked with 1%BSA in PBS-Tween  
92 (200µl/well) for 2.5h, on 37°C. Patient`s serum diluted in 2% BSA-PBS-Tween (dilutions as  
93 described below) and set of dilutions of IgE<sub>mo</sub>Ab were added (100µl/well) and incubated at 4°C  
94 overnight. Plates were then washed 5 times with 200µl/well of PBS-Tween. For detection of  
95 human IgE antibodies anti-human IgE-KPL (coupled with horse radish peroxidase) in dilution  
96 1:2.500 in 0.5%BSA-PBS-Tween was incubated for 1h at 37°C and then for 1h at 4°C. Plates  
97 were washed 5 times with 200µl/well of PBS-Tween followed by adding 100µl/well ABTS  
98 buffer and then were read after 5min, 10min, 15 min, 20min at OD 405 and 495 on ELISA reader  
99 CLARIOstar (BMG Labtech, Germany). Each patient`s serum was diluted 1:2 and 1:4 (if  
100 ImmunoCAP result for this sample were less than 50 kU<sub>A</sub>/L) or 1:8 and 1:16 (if ImmunoCAP  
101 result for this sample were more than 50 kU<sub>A</sub>/L). Using the formula  $y = -60.302 - 50.933x - 30.103x^3 + 60,7969e^x$   
102 for each OD sample obtained by ELISA we calculated the IgE concentration in  
103 ng/ml. Values with OD>2.8 after 10 min were excluded from the further calculations since curve  
104 was already reaching the plateau. Considering the two dilutions for each serum sample and  
105 exclusion of samples with OD>2.8, we obtained 34 samples for IgE reactivity testing to Bet v 1.  
106 For comparison, IgE levels to Bet v 1 for the same patients` sera were determined using  
107 quantitative IgE ImmunoCAP (Phadia 100) and by ImmunoCAP ISAC chip (Thermofisher,  
108 Uppsala, Sweden) according to manufacturer`s instructions.

109 A dilution series of IgE<sub>mo</sub>Ab (2.42 µg/ml, 242 ng/ml, 24.2 ng/ml, 2.42 ng/ml) were also tested  
110 using ImmunoCAP technology. We noted that the ImmunoCAP determination of the  
111 concentrations of IgE<sub>mo</sub>Ab were different (i.e., yielding approx. 30%) from the results obtained  
112 by microBCA protein determination which may be due to differences between the ImmunoCAP  
113 IgE standard and IgE<sub>mo</sub>AB. According to the factor  $1\text{kU}_A/\text{l} = 7\text{ ng/ml}$  (i.e., real conversion

114 factor) obtained by measuring the IgE<sub>moAb</sub> dilution by ImmunoCAP, the calculation for  
115 conversion of ImmunoCAP results from kU<sub>A</sub>/L to ng/ml were made.

116 Using a set of sera (n=19) from clinically well-characterized cat allergic patients (supplementary  
117 Table 3) Fel d 1-specific IgE levels were quantified with the IgE ELISA as described above and  
118 compared with results obtained by quantitative IgE ImmunoCAP measurements. Considering the  
119 two dilutions for each serum sample and exclusion of samples with OD>2.8, we obtained 37  
120 samples for IgE reactivity testing to Fel d 1. An OD of 0.05 was determined as a cut-off value for  
121 specific IgE reactivity by ELISA using serum dilutions from a non-allergic blood donor.

122

### 123 *Measurement of allergen-specific IgE levels by ImmunoCAP and ImmunoCAP ISAC technology*

124 In order to compare IgE levels determined by ImmunoCAP and the quantitative IgE ELISA,  
125 exactly the same recombinant allergen preparations (i.e., rBet v 1, rFel d 1) were used for the  
126 ELISA and for preparing ImmunoCAPs using Streptavidin CAPs as described<sup>S5</sup>. Two µg of  
127 biotin-labelled recombinant allergen rBet v 1 or rFel d 1 were added to the Streptavidin CAPs  
128 and incubated 30 minutes at RT. 150 µl of sera from 19 patients with cat allergy and 19 patients  
129 with birch pollen allergy and also set of dilutions of IgE<sub>moAb</sub> were tested by ImmunoCAP  
130 Phadia-100 machine as described by the manufacturer (Thermo Fisher Scientific, Waltham,  
131 USA). Nineteen patients with birch pollen allergy were additionally tested by ImmunoCAP ISAC  
132 technology according to manufacturer`s instructions (Thermo Fisher Scientific, Waltham, USA).

133

### 134 *Statistical analysis*

135 Correlation between ELISA results, ImmunoCAP and ImmunoCAP ISAC chip were assessed  
136 using Spearman's correlation coefficient. Correlation coefficients (r), regression equations, and  
137 statistical significances (p values) were determined (SPSS 11.5 for Windows, Spearman  
138 Correlation). A p value <0.05 was considered significant.

139

140 **References:**

- 141 S1. Laffer, S. *et al.* Molecular characterization of Bip 1, a monoclonal antibody that modulates  
142 IgE binding to birch pollen allergen, Bet v 1. *J. Immunol.* **157**, 4953–62 (1996).
- 143 S2. Laffer, S. *et al.* A molecular model of type I allergy: identification and characterization of  
144 a nonanaphylactic anti-human IgE antibody fragment that blocks the IgE-FcεRI  
145 interaction and reacts with receptor-bound IgE. *J. Allergy Clin. Immunol.* **108**, 409–16  
146 (2001).
- 147 S3. Lupinek, C. *et al.* Trimolecular complex formation of IgE, FcεRI, and a recombinant  
148 nonanaphylactic single-chain antibody fragment with high affinity for IgE. *J. Immunol.*  
149 **182**, 4817–4829 (2009).
- 150 S4. Grönlund, H. *et al.* Formation of disulfide bonds and homodimers of the major cat allergen  
151 Fel d 1 equivalent to the natural allergen by expression in *Escherichia coli*. *J. Biol. Chem.*  
152 **278**, 40144–51 (2003).
- 153 S5. Erwin, E. A. *et al.* Quantitative measurement of IgE antibodies to purified allergens using  
154 streptavidin linked to a high-capacity solid phase. *J. Allergy Clin. Immunol.* **115**, 1029–35  
155 (2005).

156

157 **Supplementary Figures and Tables**

158 **Supplementary Figure 1.** Coomassie-stained SDS-PAGE of purified IgE<sub>mo</sub>Ab under non-  
159 reducing and reducing conditions. M, molecular weight marker (kDa) (**A**). Nitrocellulose-blotted  
160 IgE<sub>mo</sub>Ab under non-reducing and reducing conditions was detected by anti-human IgE-HRP.  
161 Molecular weights are indicated on the left margins (**B**) Analysis of IgE<sub>mo</sub>Ab by circular  
162 dichroism. The mean residue molar ellipticities (*y*-axis: degree cm<sup>2</sup> dmol<sup>-1</sup>) were recorded for a  
163 range of wavelengths (*x*-axis) (**C**).

164

165 **Supplementary Figure S2.** Recording of standard curves at different time points. A series of  
166 dilutions of IgE<sub>mo</sub>Ab (*x*-axis: ng/ml) was reacted with ELISA plate-bound rBet v 1 and IgE  
167 binding (*y*-axis: optical density (OD) values corresponding to bound IgE) was measured at  
168 different time points (5, 10, 15 and 20 min).

169

170 **Supplementary Table S1.** Demographic and clinical characterization of birch pollen (B1-B19)  
171 and cat allergic (C1-C19) patients.

172

173 **Supplementary Table S2.** Bet v 1-specific IgE levels determined by ELISA, ImmunoCAP and  
174 ImmunoCAP ISAC for birch pollen allergic patients

175

176 **Supplementary Table S3.** Fel d 1-specific IgE levels determined by ELISA, ImmunoCAP and  
177 ImmunoCAP ISAC for cat allergic patients



178

179 **Supplementary Table S4.** Fel d 1-specific IgE levels determined by ELISA shown as optical  
180 density (OD) values for cat allergic patient's sera in dilutions 1:2 and 1:4 or 1:8 and 1:16 for C3.

181

**A**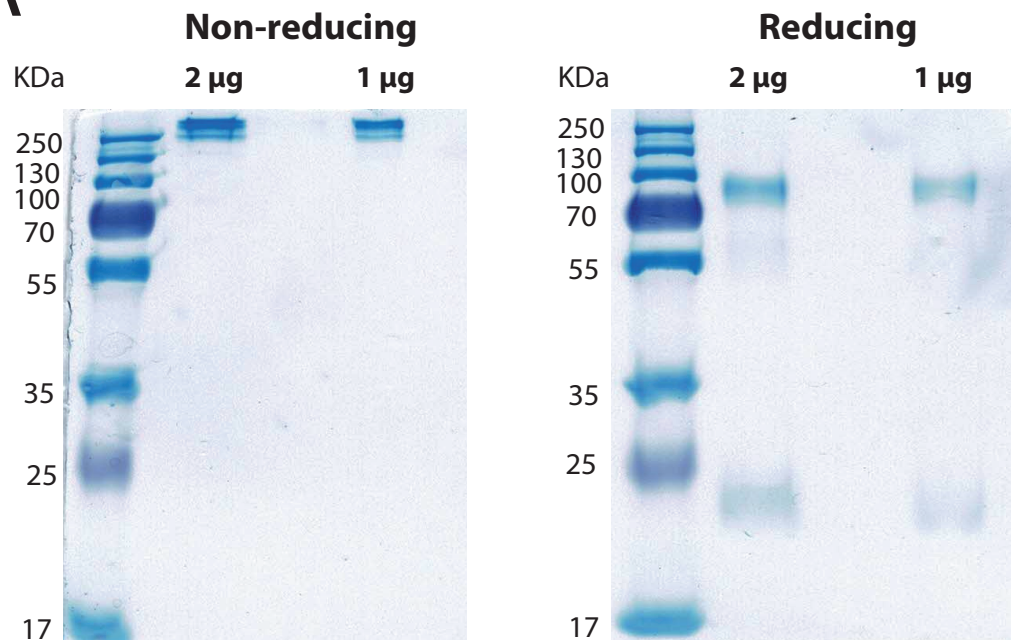**B**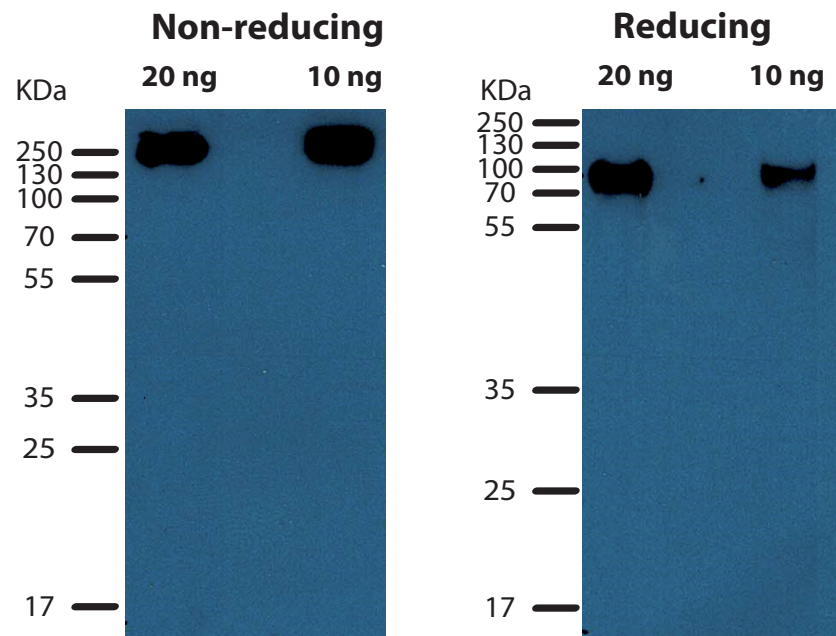**C**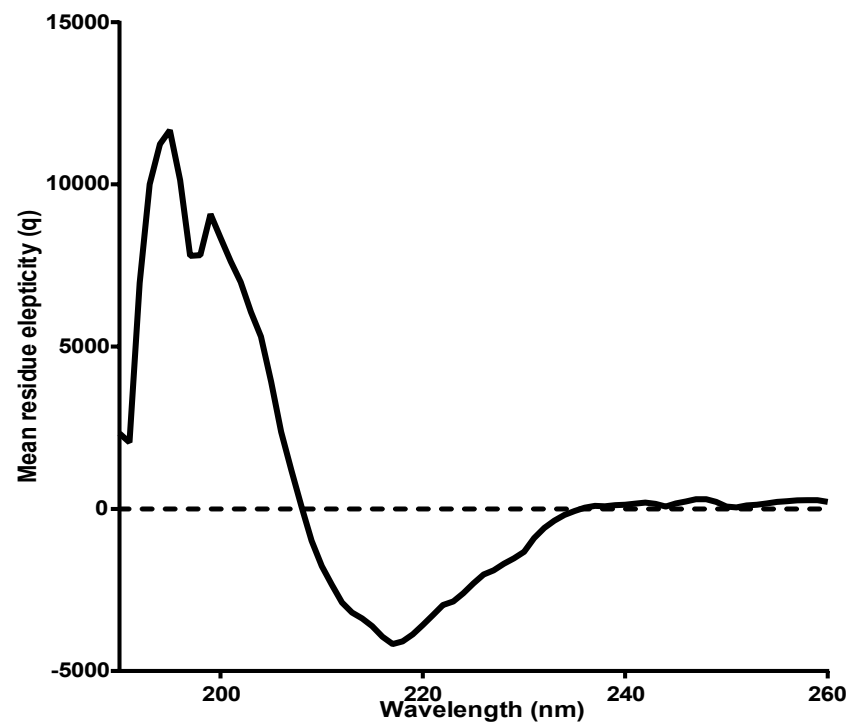

Figure S1

## Standard curve

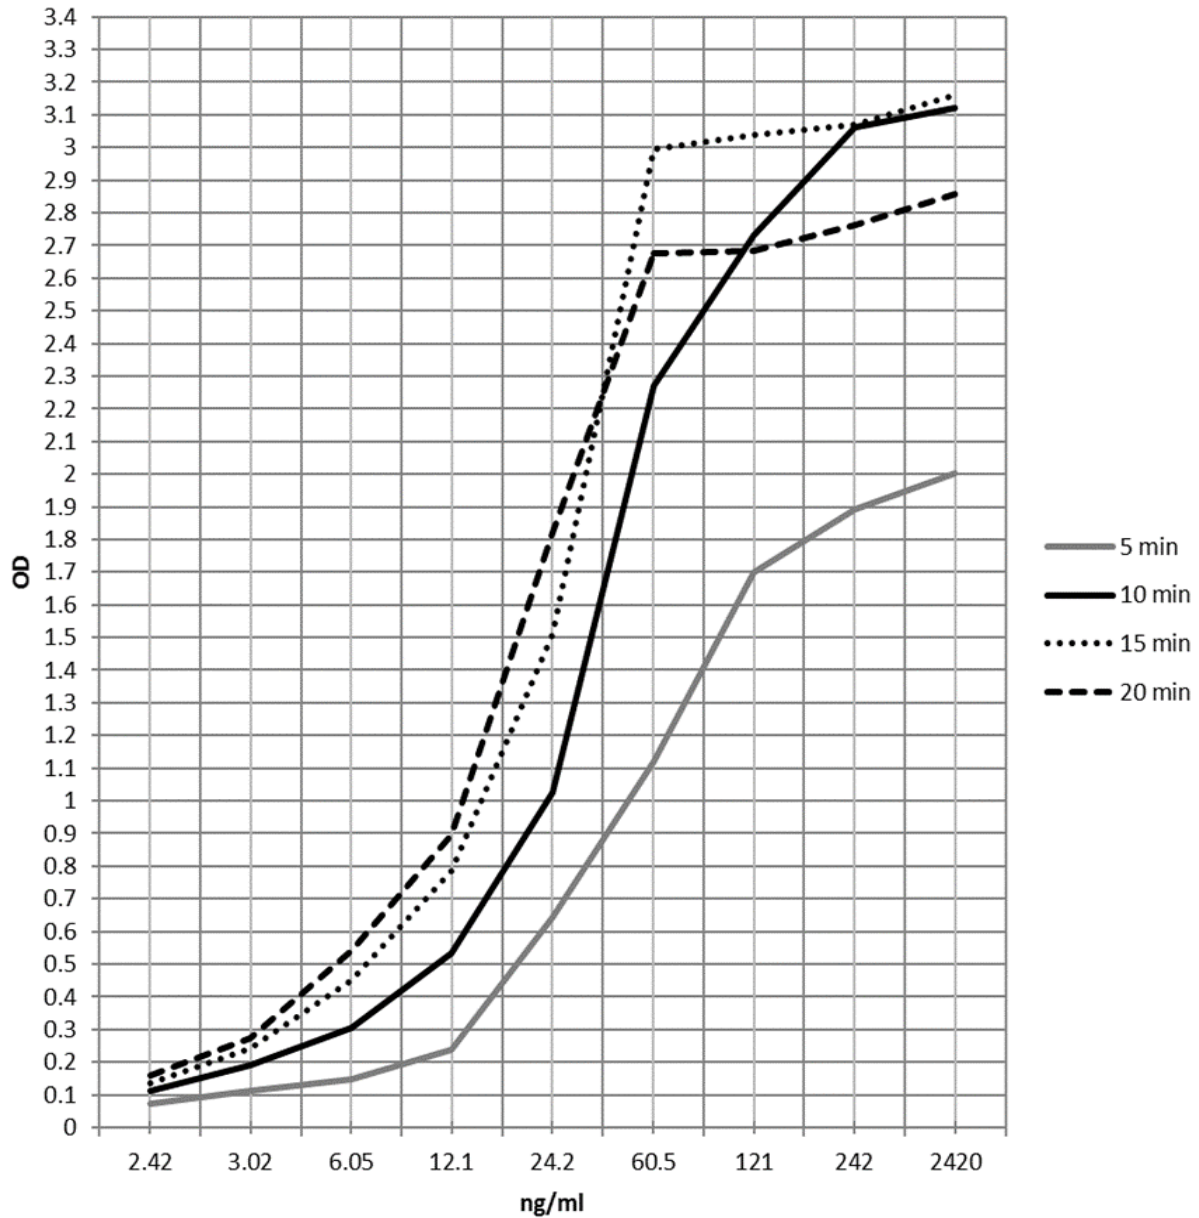

1

2 **Supplementary Figure S2.** Recording of standard curves at different time points. A series of  
3 dilutions of IgE<sub>moAb</sub> (x-axis: ng/ml) was reacted with ELISA plate-bound rBet v 1 and IgE  
4 binding (y-axis: optical density (OD) values corresponding to bound IgE) was measured at  
5 different time points (5, 10, 15 and 20 min).

6

7

8 **Supplementary Table S1.** Demographic and clinical characterization of birch pollen (B1-B19)  
 9 and cat allergic (C1-C19) patients.

|                                           | Sex | Age | Allergy clinical symptoms |          |       |         | Other allergies |     |        |      |      |
|-------------------------------------------|-----|-----|---------------------------|----------|-------|---------|-----------------|-----|--------|------|------|
|                                           |     |     | Asthma                    | Rhinitis | Conj. | Dermat. | Dust            | Pet | Pollen | Food | Mold |
| <b>Patients with Birch Pollen Allergy</b> |     |     |                           |          |       |         |                 |     |        |      |      |
| B1                                        | m   | 10  | neg                       | pos      | pos   | neg     | neg             | pos | pos    | pos  | pos  |
| B2                                        | m   | 10  | pos                       | pos      | pos   | pos     | neg             | pos | pos    | neg  | neg  |
| B3                                        | m   | 14  | neg                       | pos      | pos   | neg     | pos             | pos | pos    | pos  | pos  |
| B4                                        | m   | 15  | pos                       | pos      | pos   | pos     | pos             | pos | pos    | neg  | pos  |
| B5                                        | f   | 16  | neg                       | pos      | pos   | neg     | neg             | pos | pos    | pos  | neg  |
| B6                                        | m   | 12  | neg                       | pos      | pos   | neg     | neg             | pos | pos    | pos  | neg  |
| B7                                        | f   | 15  | neg                       | pos      | pos   | neg     | pos             | pos | pos    | pos  | neg  |
| B8                                        | f   | 12  | neg                       | pos      | pos   | pos     | neg             | pos | pos    | pos  | neg  |
| B9                                        | m   | 10  | neg                       | pos      | pos   | neg     | neg             | pos | pos    | neg  | neg  |
| B10                                       | m   | 11  | pos                       | pos      | pos   | neg     | neg             | pos | pos    | pos  | pos  |
| B11                                       | m   | 15  | neg                       | pos      | pos   | neg     | pos             | pos | pos    | neg  | neg  |
| B12                                       | f   | 11  | pos                       | pos      | pos   | pos     | neg             | pos | pos    | pos  | neg  |
| B13                                       | m   | 15  | pos                       | pos      | pos   | neg     | pos             | pos | pos    | neg  | neg  |
| B14                                       | f   | 10  | pos                       | pos      | pos   | pos     | pos             | pos | pos    | pos  | neg  |
| B15                                       | f   | 11  | neg                       | pos      | pos   | neg     | neg             | pos | pos    | neg  | neg  |
| B16                                       | f   | 11  | neg                       | pos      | pos   | neg     | neg             | pos | pos    | neg  | neg  |
| B17                                       | f   | 11  | pos                       | pos      | pos   | neg     | neg             | pos | pos    | neg  | neg  |
| B18                                       | m   | 10  | neg                       | pos      | pos   | pos     | neg             | pos | pos    | neg  | neg  |
| B19                                       | f   | 15  | neg                       | pos      | pos   | pos     | pos             | pos | pos    | pos  | neg  |
| <b>Patients with Cat Allergy</b>          |     |     |                           |          |       |         |                 |     |        |      |      |
| C1                                        | m   | 29  | pos                       | neg      | pos   | neg     | pos             | pos | pos    | pos  | pos  |
| C2                                        | m   | 26  | pos                       | pos      | pos   | pos     | pos             | pos | pos    | n/d  | n/d  |
| C3                                        | f   | 25  | pos                       | pos      | pos   | pos     | pos             | pos | pos    | n/d  | pos  |
| C4                                        | f   | 62  | pos                       | pos      | pos   | pos     | n/d             | n/d | n/d    | n/d  | n/d  |
| C5                                        | f   | 35  | pos                       | pos      | pos   | pos     | pos             | pos | pos    | n/d  | n/d  |
| C6                                        | f   | 27  | pos                       | pos      | pos   | pos     | pos             | pos | pos    | n/d  | n/d  |
| C7                                        | m   | 21  | pos                       | pos      | pos   | neg     | pos             | pos | pos    | n/d  | n/d  |
| C8                                        | m   | 29  | neg                       | pos      | pos   | pos     | pos             | pos | neg    | n/d  | n/d  |
| C9                                        | m   | 24  | pos                       | pos      | pos   | pos     | pos             | pos | pos    | pos  | n/d  |
| C10                                       | f   | 57  | neg                       | pos      | pos   | neg     | pos             | pos | pos    | n/d  | n/d  |
| C11                                       | m   | 47  | neg                       | pos      | pos   | neg     | neg             | neg | pos    | n/d  | n/d  |
| C12                                       | m   | 20  | pos                       | pos      | pos   | neg     | pos             | pos | pos    | n/d  | n/d  |
| C13                                       | m   | 31  | pos                       | pos      | neg   | neg     | neg             | pos | n/d    | n/d  | neg  |
| C14                                       | m   | 20  | pos                       | pos      | pos   | neg     | pos             | pos | pos    | pos  | n/d  |
| C15                                       | m   | 22  | pos                       | pos      | neg   | neg     | pos             | pos | neg    | n/d  | n/d  |
| C16                                       | m   | 20  | pos                       | pos      | neg   | neg     | pos             | pos | pos    | pos  | n/d  |
| C17                                       | f   | 38  | neg                       | pos      | pos   | neg     | pos             | pos | pos    | n/d  | n/d  |
| C18                                       | f   | 40  | pos                       | pos      | pos   | neg     | n/d             | n/d | n/d    | n/d  | n/d  |
| C19                                       | m   | 18  | pos                       | pos      | pos   | neg     | pos             | pos | pos    | n/d  | n/d  |

10 **Supplementary Table S2.** Bet v 1-specific IgE levels determined by ELISA, ImmunoCAP and  
 11 ImmunoCAP ISAC for birch pollen allergic patients (B1-B19)

| Patient ID | OD Mean | ng/ml  | ImmunoCAP kU <sub>A</sub> /L | ISAC ISU |
|------------|---------|--------|------------------------------|----------|
| B1         | 2.209   | 902.4  | 346                          | 139.9    |
| B2         | 0.867   | 329.6  | 64                           | 11.1     |
| B3         | 0.828   | 313.6  | 62.3                         | 52.5     |
| B4         | 0.594   | 212.8  | 60.5                         | 57.2     |
| B5         | 0.859   | 326.4  | 59.7                         | 59.9     |
| B6         | 1.014   | 97.2   | 48                           | 45.8     |
| B7         | 0.88    | 334.4  | 75.7                         | 78.2     |
| B8         | 2.595   | 1536   | 331                          | 153.5    |
| B9         | 1.035   | 396.8  | 16.1                         | 20.3     |
| B10        | 1.576   | 142.4  | 46                           | 22.7     |
| B11        | 0.59    | 52.4   | 9.69                         | 16.3     |
| B12        | 1.058   | 101.2  | 42.1                         | 32.8     |
| B13        | 0.268   | 20     | 3.07                         | 3.7      |
| B14        | 0.943   | 90     | 33                           | 11.4     |
| B15        | 2.742   | 1966.4 | 430                          | 148.1    |
| B16        | 0.306   | 23.2   | 2.64                         | 4.1      |
| B17        | 0.199   | 14     | 1.68                         | 3.3      |
| B18        | 1.238   | 467.2  | 146                          | 52.7     |
| B19        | 2.703   | 1838.4 | 342                          | 144.3    |

12  
 13 **Supplementary Table S3.** Fel d 1-specific IgE levels determined by ELISA and ImmunoCAP  
 14 for cat allergic patients (C1-C19) and non-allergic donor (D1)

| Patient ID | OD Mean | ng/ml | ImmunoCAP kU <sub>A</sub> /L |
|------------|---------|-------|------------------------------|
| C1         | 0.703   | 64.8  | 5.20                         |
| C2         | 1.816   | 162.8 | 34.50                        |
| C3         | 1.041   | 398.4 | 57.20                        |
| C4         | 0.059   | 4.8   | 0.03                         |
| C5         | 0.059   | 4.8   | 0.08                         |
| C6         | 0.687   | 63.2  | 8.79                         |
| C7         | 0.621   | 56    | 5.43                         |
| C8         | 0.153   | 10.8  | 1.76                         |
| C9         | 1.143   | 108.8 | 16.30                        |
| C10        | 0.418   | 34.4  | 2.55                         |
| C11        | 0.064   | 4.8   | 0.10                         |
| C12        | 0.061   | 4.8   | 0.08                         |
| C13        | 0.534   | 46.4  | 3.19                         |
| C14        | 0.115   | 8     | 1.60                         |
| C15        | 0.069   | 5.2   | 0.16                         |
| C16        | 0.145   | 10    | 1.34                         |
| C17        | 0.573   | 50.8  | 4.50                         |
| C18        | 2.331   | 260.8 | 22.80                        |
| C19        | 0.703   | 368   | 29.00                        |

| Donor ID |       |       |
|----------|-------|-------|
| D1       | 0.043 | 0.001 |

15

16 **Supplementary Table S4.** Fel d 1-specific IgE levels determined by ELISA shown as optical  
 17 density (OD) values for cat allergic patient's sera in dilutions 1:2 and 1:4 or 1:8 and 1:16 for C3.

| Patient ID | Serum Dilution | OD Mean | ng/ml |
|------------|----------------|---------|-------|
| C1         | 1:2            | 1.262   | 59.4  |
| C1         | 1:4            | 0.703   | 64.8  |
| C2         | 1:2            | 2.734   | 242.6 |
| C2         | 1:4            | 1.816   | 162.8 |
| C3         | 1:8            | 2.100   | 403.2 |
| C3         | 1:16           | 1.041   | 398.4 |
| C4         | 1:2            | 0.067   | 2.6   |
| C4         | 1:4            | 0.059   | 4.8   |
| C5         | 1:2            | 0.075   | 2.8   |
| C5         | 1:4            | 0.059   | 4.8   |
| C6         | 1:2            | 1.090   | 52    |
| C6         | 1:4            | 0.687   | 63.2  |
| C7         | 1:2            | 1.131   | 54    |
| C7         | 1:4            | 0.621   | 56    |
| C8         | 1:2            | 0.264   | 9.8   |
| C8         | 1:4            | 0.153   | 10.8  |
| C9         | 1:2            | 2.057   | 97    |
| C9         | 1:4            | 1.143   | 108.8 |
| C10        | 1:2            | 0.491   | 21    |
| C10        | 1:4            | 0.418   | 34.4  |
| C11        | 1:2            | 0.091   | 3.2   |
| C11        | 1:4            | 0.064   | 4.8   |
| C12        | 1:2            | 0.062   | 2.4   |
| C12        | 1:4            | 0.061   | 4.8   |
| C13        | 1:2            | 0.779   | 36.6  |
| C13        | 1:4            | 0.534   | 46.4  |
| C14        | 1:2            | 0.156   | 5.4   |
| C14        | 1:4            | 0.115   | 8.00  |
| C15        | 1:2            | 0.082   | 3.00  |
| C15        | 1:4            | 0.069   | 5.20  |
| C16        | 1:2            | 0.189   | 6.6   |
| C16        | 1:4            | 0.145   | 10.00 |
| C17        | 1:2            | 0.879   | 41.8  |
| C17        | 1:4            | 0.573   | 50.8  |
| C18        | 1:2            | 2.695   | 226.6 |
| C18        | 1:4            | 2.3331  | 260.8 |
| C19        | 1:2            | 2.979   | 375.8 |
| C19        | 1:4            | 2.569   | 368   |
| Donors ID  |                |         |       |
| D1         | 1:2            | 0.045   |       |
| D1         | 1:4            | 0.043   |       |

18
